# Supplementary material for: The Construct CoSe2 on Carbon Nanosheets as High Sensitivity Catalysts for Electro-Catalytic Oxidation of Glucose
Source: MDPI journal article supplement (doi:10.3390/nano12030572), 2022-02-07
Supplement: s1 [file s1]

## Supplementary Materials

# The Construct CoSe<sub>2</sub> on Carbon Nanosheets as High Sensitivity Catalysts for Electro-Catalytic Oxidation of Glucose

Di Wang <sup>1,2</sup> and Ying Chang <sup>1,\*</sup>

<sup>1</sup> Inner Mongolia Key Laboratory of Green Catalysis and Inner Mongolia Collaborative Innovation Center for Water Environment Safety, College of Chemistry and Environmental Science, Inner Mongolia Normal University, Hohhot 010022, China; 2120200811@mail.nankai.edu.cn

<sup>2</sup> Key Laboratory of Advanced Energy Materials Chemistry (Ministry of Education), Renewable Energy Conversion and Storage Center (RECAST), College of Chemistry, Nankai University, Tianjin 300071, China

\* Correspondence: changying@imnu.edu.cn

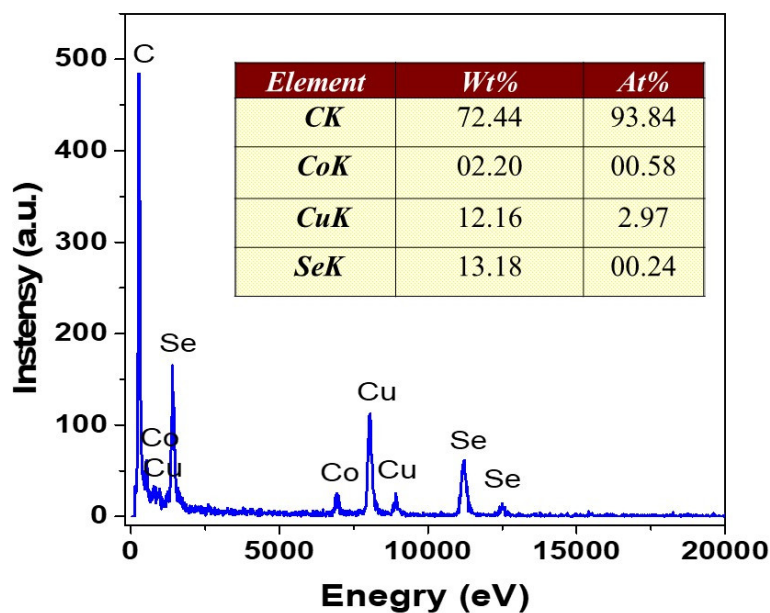

Figure S1. EDS patterns of CoSe<sub>2</sub>-400 nanomaterial.

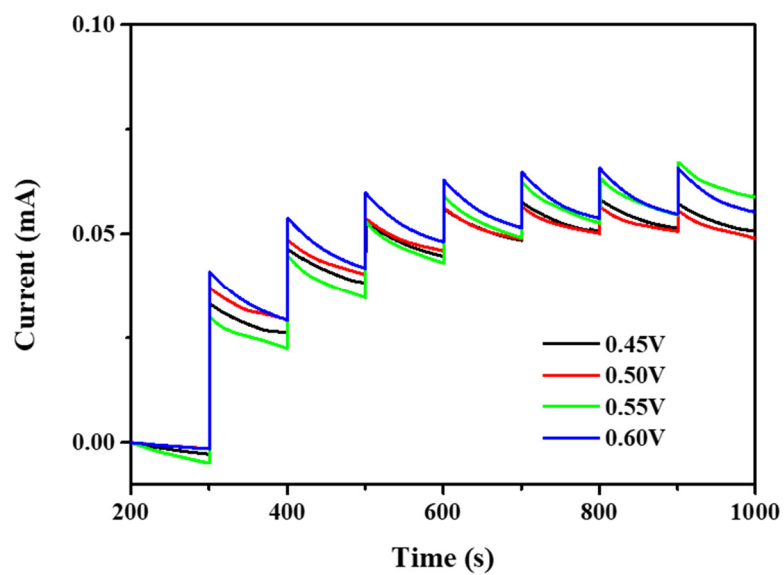

**Figure S2.** I-t curves at different applied voltages of CoSe<sub>2</sub>-400 nanocomposite, the current at 200s is as the background.
